# Supplementary material for: A System-Level Mechanism of Anmyungambi Decoction for Obesity: A Network Pharmacological Approach
Source: MDPI journal article supplement (doi:10.3390/biom11121881), 2021-12-15
Supplement: s1 [file s1]

**Supplementary Table S1.** Enrichment analysis of tissues by the targets of compounds of Phellodendri Cortex, Gardeniae Fructus, Glycine Semen Preparata, and Ephedrae Herba. Only the results with P-values < 0.05 are shown.

| Herb                          | Term                          | Overlap | P-value<br>(adjusted) | Odd<br>ratio | Combined<br>Score |
|-------------------------------|-------------------------------|---------|-----------------------|--------------|-------------------|
| Phellodendri<br>Cortex        | Lymph node                    | 5/37    | 0.0056                | 11.15        | 97.46             |
|                               | Adrenal cortex                | 8/106   | 0.0056                | 5.87         | 52.67             |
| Gardeniae<br>Fructus          | Adipocyte                     | 21/181  | 1.61E-06              | 4.89         | 86.55             |
|                               | Smooth muscle                 | 29/363  | 8.14E-06              | 3.26         | 50.09             |
|                               | Liver                         | 40/618  | 8.43E-06              | 2.62         | 39.13             |
|                               | Adrenal cortex                | 11/106  | 2.43E-03              | 4.25         | 37.82             |
|                               | Fetal liver                   | 12/126  | 2.43E-03              | 3.86         | 33.88             |
|                               | Hypothalamus                  | 9/97    | 1.08E-02              | 3.74         | 25.06             |
|                               | Small intestine               | 16/220  | 4.24E-03              | 2.89         | 23.18             |
|                               | Bronchial<br>epithelial cells | 18/280  | 7.01E-03              | 2.53         | 18.66             |
|                               | Cardiac myocytes              | 17/273  | 1.08E-02              | 2.44         | 16.34             |
|                               | Placenta                      | 11/405  | 0.0107                | 4.02         | 34.38             |
| Glycine<br>Semen<br>Preparata | Liver                         | 13/618  | 0.0168                | 3.11         | 23.01             |
|                               | CD105+<br>Endothelial         | 9/370   | 0.0296                | 3.55         | 22.81             |
|                               | Hypothalamus                  | 10/97   | 0.000412              | 6.33         | 72.19             |
| Ephedrae<br>Herba             | Adipocyte                     | 15/181  | 0.0000918             | 5.03         | 68.36             |
|                               | Fetal liver                   | 9/126   | 0.00761               | 4.22         | 31.94             |
|                               | Smooth muscle                 | 17/363  | 0.00761               | 2.72         | 21.33             |
|                               | Liver                         | 24/618  | 0.00761               | 2.26         | 17.36             |
